# Supplementary material for: The Role of Mycangial Fungi Associated with Ambrosia Beetles (Euwallacea interjectus) in Fig Wilt Disease: Dual Inoculation of Fusarium kuroshium and Ceratocystis ficicola Can Bring Fig Saplings to Early Symptom Development
Source: MDPI journal article supplement (doi:10.3390/microorganisms10101912), 2022-09-27
Supplement: s1 [file s1]

## Supplementary materials

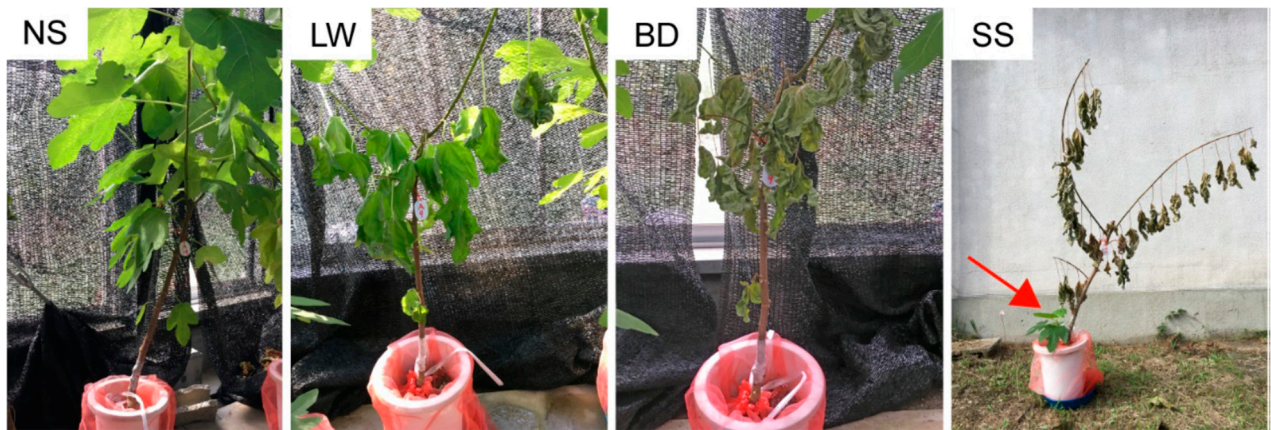

**Figure S1.** A typical wilt symptom in fig saplings inoculated with *Ceratocystis ficicola* (T3). Examples of T3-14 (NS), T3-09 (LW, BD), and T3-10 (SS) are shown. NS: No apparent difference was observed compared to the non-inoculated saplings; LW: Some leaves began to droop and wilt 12 days after inoculation; BD: All leaves became brown 15 days after inoculation; SS: One shoot sprouted (red arrow) below the inoculation site 9 days after death of the stem.

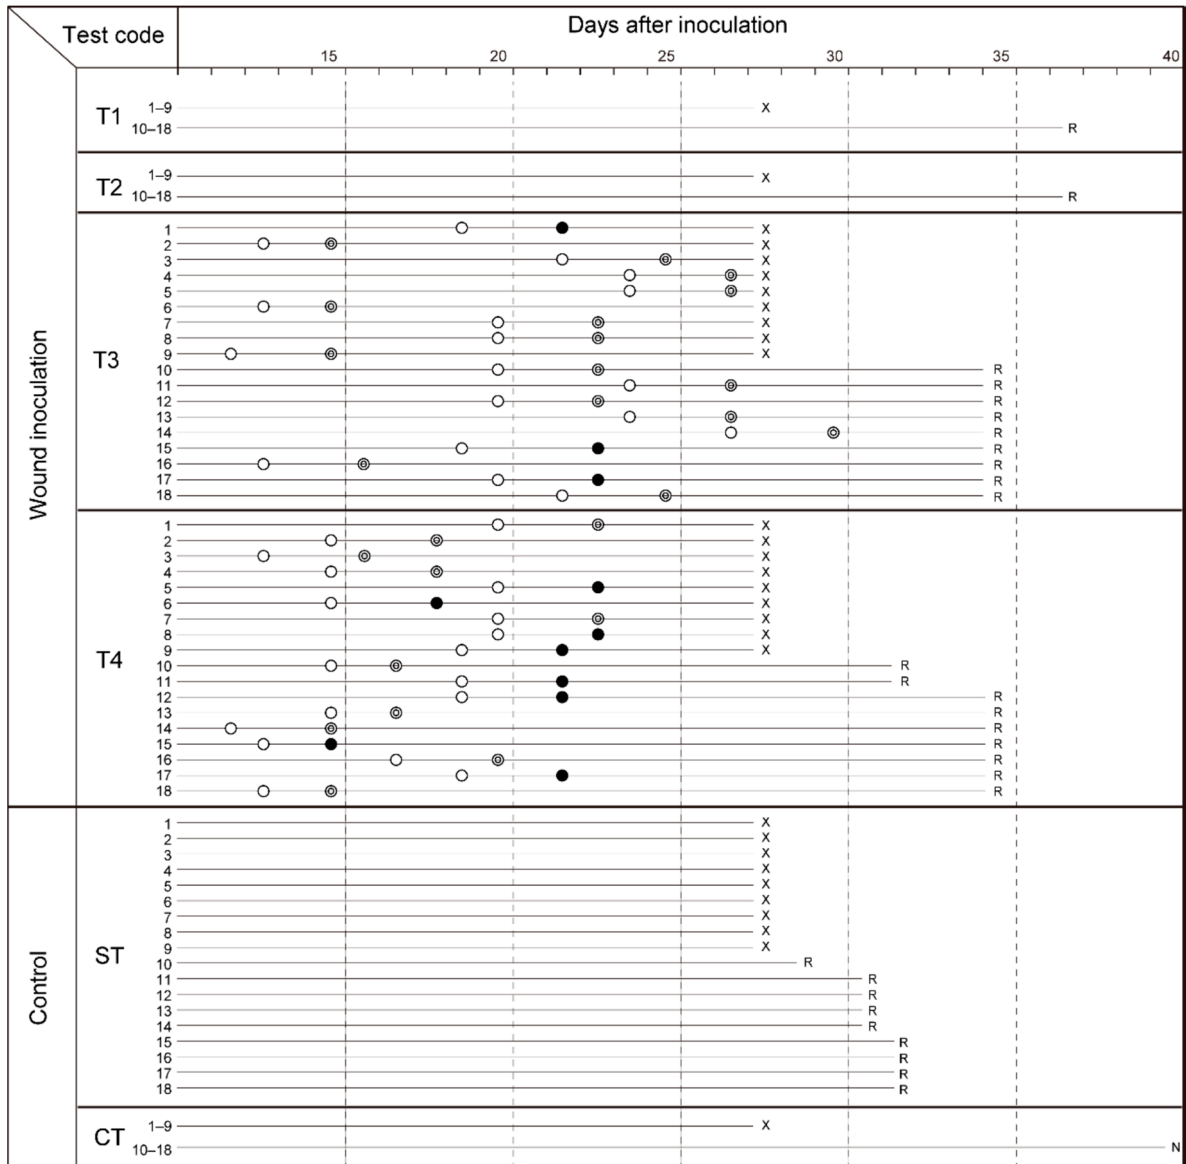

**Figure S2.** Symptom development in each fig sapling after inoculation. Open circle: Beginning of leaf dropping; Filled circle: Browning of all leaves and dead of stem; Double circle: Dead of stem and sprouting below the inoculation site; X: Xylem sap-conduction test; R: Re-isolation test of the inoculated fungi; N: No use for X and R.

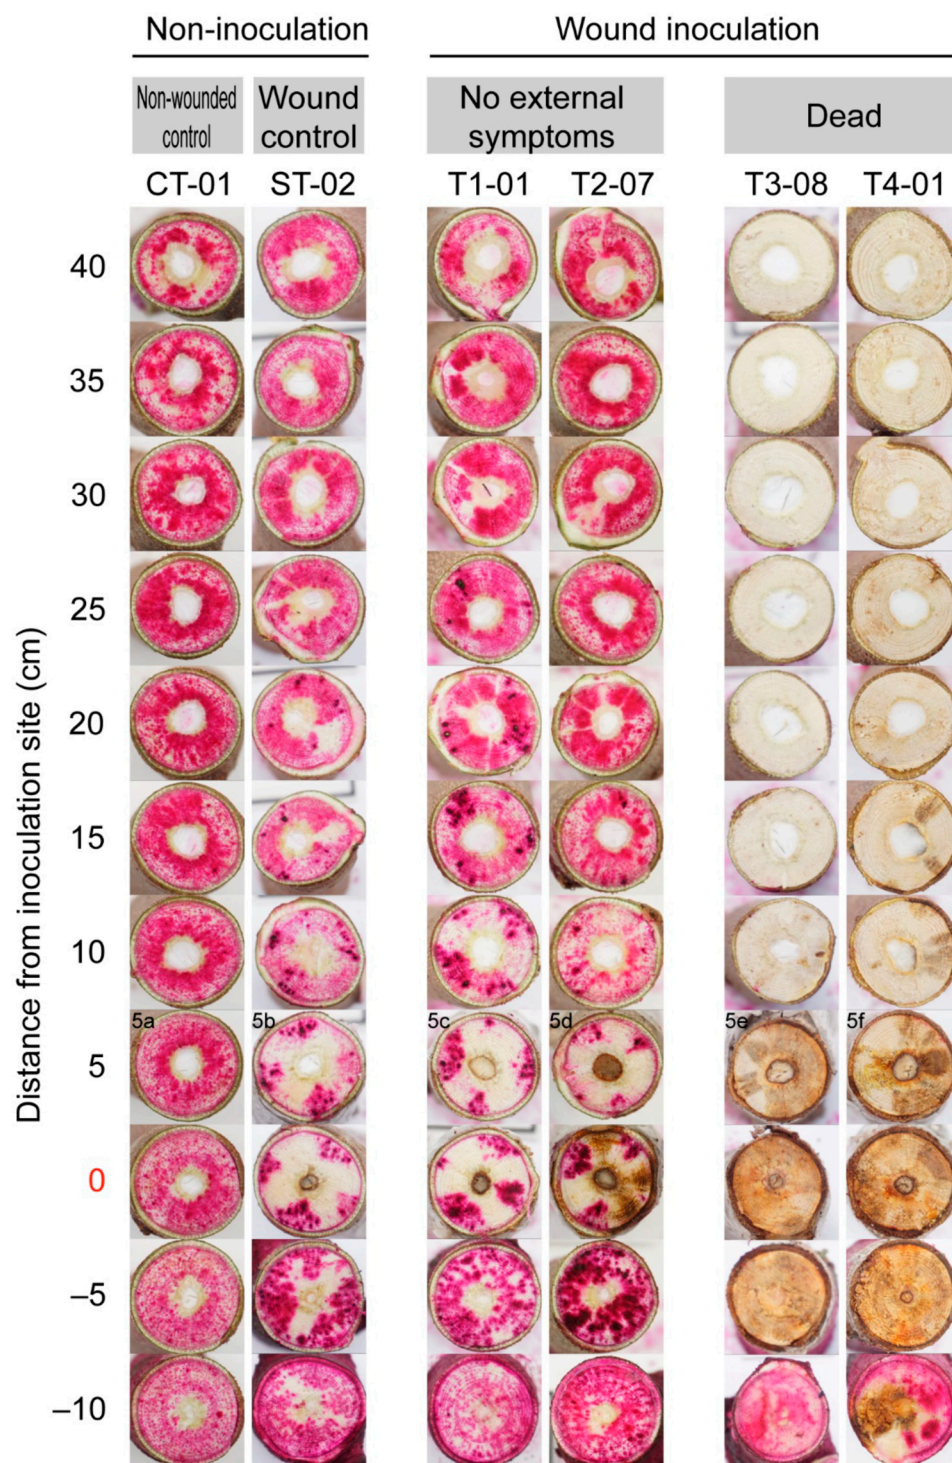

**Figure S3.** Crosscut stem surfaces of fig saplings that absorbed the acid fuchsin solution. Examples of T3-08 and T4-01 (Dead), T1-01 and T2-07 (No external symptoms), ST-02 (Wound control), and CT-01 (Non-wounded control) are shown.

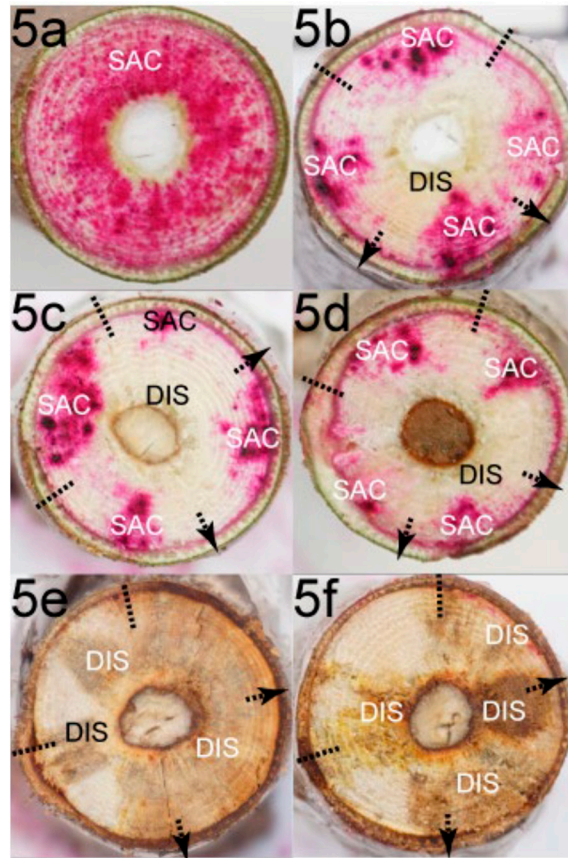

**Figure S4.** Typical examples (i.e., 5a, 5b, 5c, 5d, 5e, and 5f in Figure S3) of pink areas dyed with acid fuchsin solution and brown discoloration on cross stem sections 5 cm above the inoculation site. SAC: Xylem sap-conduction area; DIS: Xylem discoloration area; Dotted line and arrow: Inoculation site and insert direction.



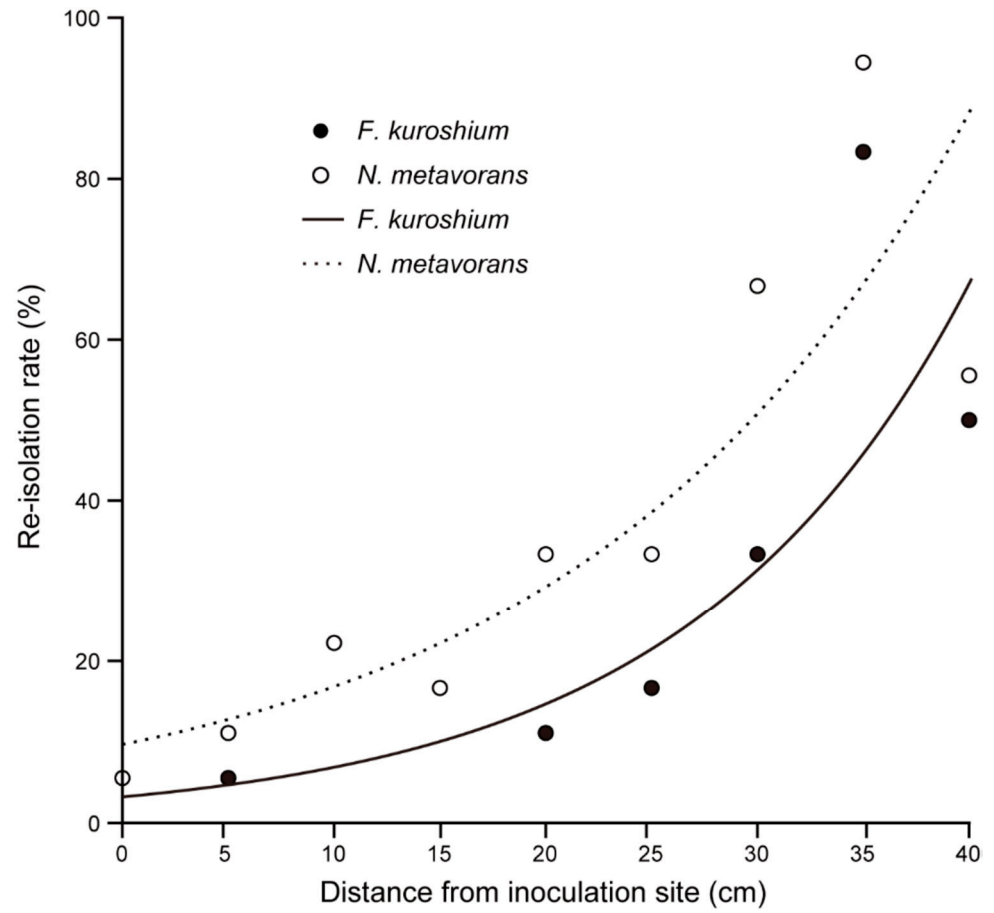

**Figure S5.** Curve fitting of the re-isolation rate of *Fusarium kuroshium* in T1 and *Neocosmospora metavorans* in T2. *F. kuroshium*:  $y = 3.2235e^{0.0758x}$ ,  $R^2 = 0.878$ ,  $P = 0.005 < 0.01$ ; *N. metavorans*:  $y = 9.6928e^{0.0552x}$ ,  $R^2 = 0.835$ ,  $P = 0.011 < 0.05$ .
